# Supplementary material for: Revealing the seed proteome of the health benefitting grain amaranth (Amaranthus cruentus L.)
Source: publisher site journal article supplement (doi:10.1515/chempap-2016-0065), 2016-01-01
Supplement: Supplementary file 1 [file chempap-2016-0065_supplement_1.docx]

**SUPPLEMENTARY DATA**

**Revealing the seed proteome of the health benefitting grain amaranth (*Amaranthus cruentus* L.)**

**aKatarína Klubicová, bMonika Szabová, cĽudovít Škultéty, aGabrielaLibiaková, aAndrea Hricová**[[1]](#footnote-1)*

a*Institute of Plant Genetics and Biotechnology, Slovak Academy of Sciences, Akademická 2, P.O. Box 39A, Nitra 95007, Slovakia*

b*Slovak University of Agriculture in Nitra, Faculty of Biotechnology and Food Sciences, Department of Biochemistry and Biotechnology, Tr. Andreja Hlinku 2, 94976, Nitra, Slovakia*

c*Institute of Virology, Slovak Academy of Sciences, Dúbravská cesta 9, 84505 Bratislava, Slovakia*

Received 3 November 2015; Revised 3 February 2016; Accepted 17 February 2016

**Supplementary information**

**Supplemental Figure 1.**  2-DE gel image of amaranth grain obtained using IPG strips with pH 3-10.

**Supplemental Table 1.**  The relative spot volumes (%V) of all 461 quantified proteins presented on 2-DE gels of pH 5-8. The table shows the triplicate analysis data of proteins of *Amaranthus cruentus* L. grains, average, standard deviation - STDEV.

**Supplemental Table 2.**  The complete list of 249 proteins identified from mature amaranth grains that were classified into 13 functional categories. The table shows: Protein description, Protein name; Accession number, UniProt accession number; Localization, subcellular localization; Spot ID, spot number in gels obtained by ImageMaster analysis; PLGS Score, score provided by Protein Lynx software; Pep/Cov, number of identified peptides/coverage in %; Theor MW/pI, theoretical MW/pI value; Exp MW/pI, experimental MW/pI value.


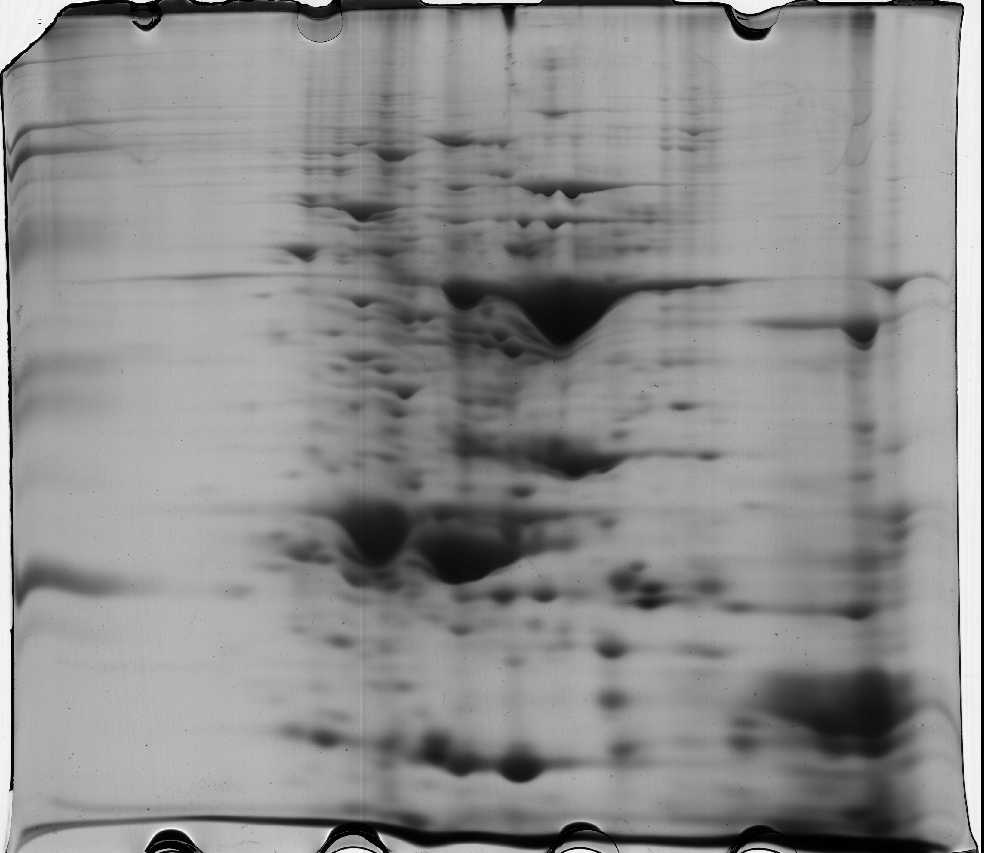


3

10

5

8

**Supplemental Figure 1.**  2-DE gel image of amaranth grain obtained using IPG strips with pH 3-10.

1. *Corresponding author, e-mail: andrea.hricova@savba.sk [↑](#footnote-ref-1)
