# Supplementary figures and images for: Revealing the seed proteome of the health benefitting grain amaranth (Amaranthus cruentus L.)
Source: publisher site journal article supplement (doi:10.1515/chempap-2016-0065), 2016-01-01

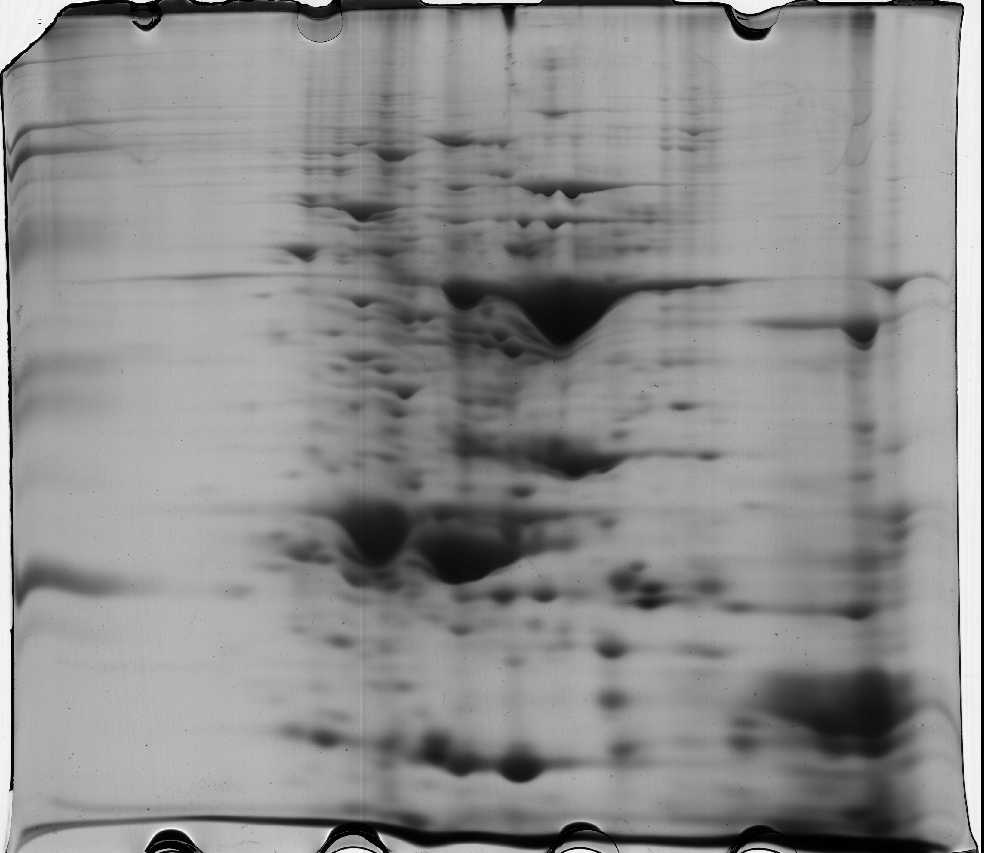


3

10

5

8

**Supplemental Figure 1.**  2-DE gel image of amaranth grain obtained using IPG strips with pH 3-10.

Supplement: Supplementary file 2 [file chempap-2016-0065_supplement_2.docx]
